# Supplementary material
Source: PubMed Central journal article supplement (PMC2943290)

SUPPORTING INFORMATION, Chen et al.

Supporting Information FIGURE 1. **Product inhibition data for OsGH3-8.** Assays were performed as described in the Experimental Procedures. The lines represent fit of the data to one of the three inhibition equations. (A) Double-reciprocal plot of  $1/v$  vs  $1/[ATP]$  at unsaturating IAA and aspartate concentrations with 0, 0.05, 0.1, and 0.2 mM  $PP_i$  (from bottom to top). (B) Double-reciprocal plot of  $1/v$  vs  $1/[ATP]$  at with saturating IAA and unsaturating aspartate concentrations with 0, 0.05, and 0.1 mM  $PP_i$  (from bottom to top). (C) Double-reciprocal plot of  $1/v$  vs  $1/[Asp]$  at unsaturating ATP and aspartate concentrations with 0, 0.05, 0.1, and 0.2 mM  $PP_i$  (from bottom to top). (D) Double-reciprocal plot of  $1/v$  vs  $1/[IAA]$  at saturating ATP and unsaturating aspartate concentrations with 0, 0.05, 0.1, and 0.2 mM  $PP_i$  (from bottom to top). (E) Double-reciprocal plot of  $1/v$  vs  $1/[aspartate]$  at unsaturating ATP and IAA concentrations with 0, 0.05, 0.1, and 0.2 mM  $PP_i$  (from bottom to top). (F) Double-reciprocal plot of  $1/v$  vs  $1/[ATP]$  at unsaturating concentrations of IAA and aspartate with 0, 0.05, 0.1, and 0.2 mM IAA-Asp. (G) Double-reciprocal plot of  $1/v$  vs  $1/[IAA]$  at unsaturating concentrations of ATP and aspartate with 0, 0.05, 0.1, and 0.2 mM IAA-Asp. (H) Double-reciprocal plot of  $1/v$  vs  $1/[aspartate]$  at unsaturating concentrations of IAA and ATP with 0, 0.05, 0.1, and 0.2 mM IAA-Asp.

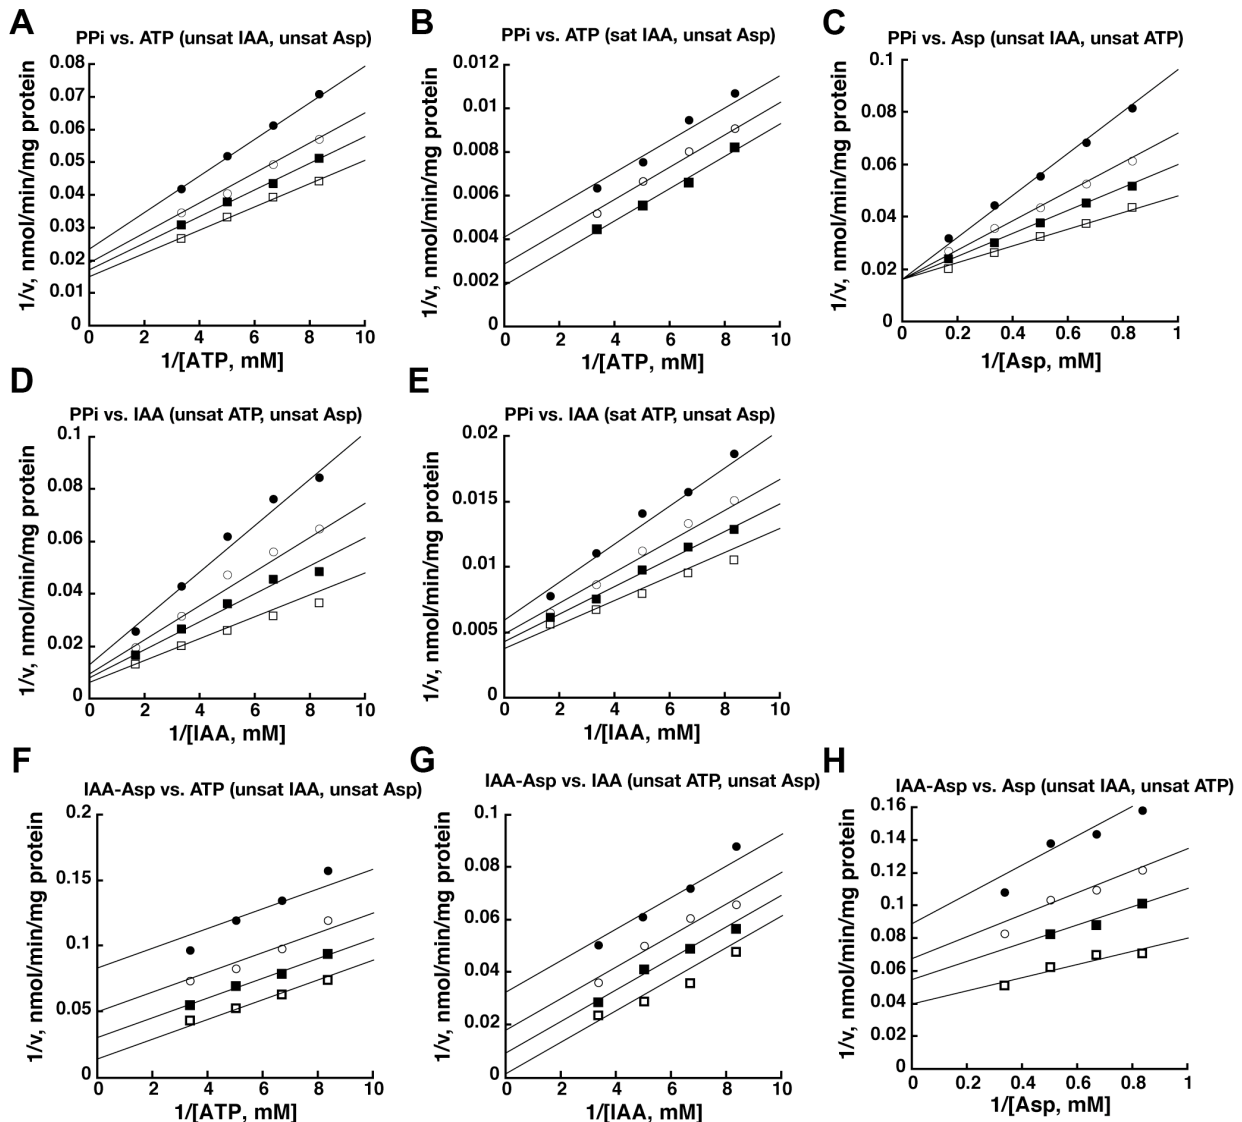

Supporting Information FIGURE 2. **Mass spectrometric analysis of GH3-8 activity.** ESI-Q-TOF mass spectra of selected mass ranges for the IAA-AMP intermediate [ $m/z$  500-509 (right)] and the IAA-Asp product [ $m/z$  250-320 (left)] for (A) an assay containing GH3-8, IAA, and ATP in the absence of Asp and (B) an assay containing GH3-8, IAA, and ATP in the presence of Asp. Note the absence of IAA-Asp signal in the left panel of A and the absence of IAA-AMP in the right panel of B.

A. IAA + ATP+ enzyme

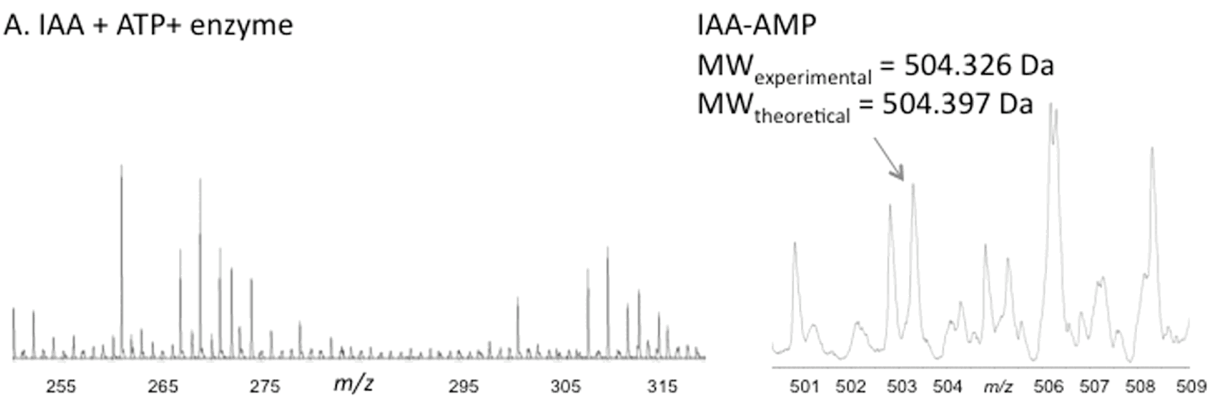

B. IAA + ATP + enzyme + ASP

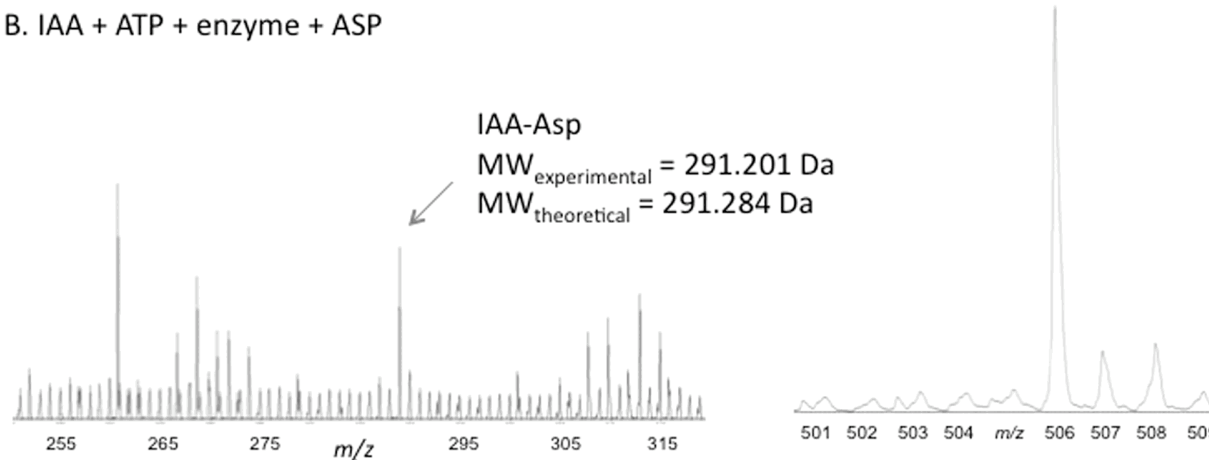

Supplement: supp_M110.146431_jbc.M110.146431-1.pdf [file supp_M110.146431_jbc.M110.146431-1.pdf]
